# Supplementary material for: Induced unconventional superconductivity on the surface states of Bi2Te3 topological insulator
Source: PubMed Central journal article supplement (PMC5722924; doi:10.1038/s41467-017-02069-z), 2017-12-08
Supplement: 41467_2017_2069_MOESM1_ESM.pdf [file 41467_2017_2069_MOESM1_ESM.pdf]

## Supplementary Note 1. EFFECTIVE AREA OF A PLANAR JOSEPHSON JUNCTION

The effective area  $A_{\text{eff}}$  of a planar junction in the thin film limit  $t < 2\lambda$ , with  $t$  the film thickness and  $\lambda$  the London penetration depth, having a junction width,  $w$ , much smaller than the Pearl length,  $\lambda_{\perp} = \lambda^2/t$ , is well approximated by the following expression<sup>1</sup>

$$A_{\text{eff}} \approx wL + w^2/1.82. \quad (1)$$

Here  $L$  is the distance between the electrodes (see Supplementary Figure 1). For junction widths larger than the Pearl length, Supplementary Equation (1) is not anymore valid and the effective area has to be computed numerically.

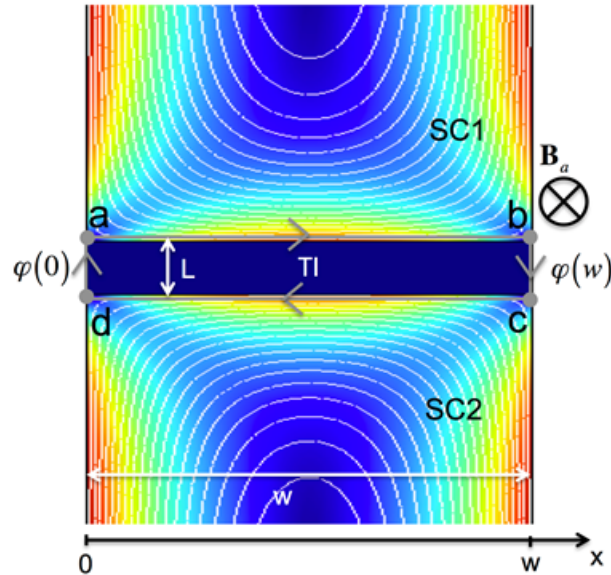

Supplementary Figure 1: **Supercurrent density distribution in a planar Josephson junction.** Sketch of two superconducting electrodes (SC1, SC2) contacted to a normal conducting channel (TI). The gray loop indicated the path integral used in Supplementary Equation (4).  $B_a$  is the externally applied magnetic field. The white lines indicate the current flow direction of the screening current and the color-coding in the electrodes reflects the amplitude of the screening current density (red: large, blue: small).

The effective area can be determined numerically as it follows.

First we calculate the Meissner screening currents in the superconducting electrodes by solving the Maxwell London equations on the junction geometry in the presence of an externally applied magnetic field:

$$\mu_0 \nabla \times (\lambda^2 \cdot \mathbf{j}) + \mathbf{B} = 0; \quad \nabla \times \mathbf{B} = \mu_0 \mathbf{J}. \quad (2)$$

Here  $\mu_0$  is the vacuum permeability,  $\mathbf{j}$  is the supercurrent density in the electrodes, and  $\mathbf{B}$  is the magnetic induction containing the externally applied field,  $B_a$ , and the field generated by the supercurrents.

Next we need to calculate the difference between the gauge invariant phase differences across the junction at the left edge  $\phi(0)$  and right edge  $\phi(w)$  of the junction (see Supplementary Figure 1). From the above calculated Meissner currents and resulting magnetic fields we can readily compute  $\Delta\phi = \phi(w) - \phi(0)$  making use of the property that the superconducting phase is single valued in the electrodes:

$$\Delta\phi = \frac{2\pi}{\phi_0} \oint \mathbf{A} \cdot \partial\mathbf{l} + \mu_0\lambda^2 \left[ \int_a^b \mathbf{j} \cdot \partial\mathbf{l} + \int_c^d \mathbf{j} \cdot \partial\mathbf{l} \right]. \quad (3)$$

Here  $\phi_0 = 2 \cdot 10^{-15}$  Vs is the superconducting flux quantum and  $\mathbf{A}$  is the vector potential with  $\mathbf{B} = \nabla \times \mathbf{A}$ . The closed path integral in the first term of the right hand side of the equation is taken along a loop enclosing the two edges of the junction at  $x = 0$  and  $x = w$ . For the loop indicated in Supplementary Figure 1 the closed path integral corresponds to the total magnetic flux through the normal conductor in the junction. The line integrals in the second term of the right hand side of the Supplementary Equation (3) are taken only within the superconducting electrodes, i.e. from point  $a$  to  $b$  in the upper electrode, SC1, and from point  $c$  to  $d$  in the lower electrode, SC2 (see Supplementary Figure 1).

The effective area of the junction is finally obtained using the following standard expression:

$$A_{\text{eff}} = \frac{\phi_0}{2\pi} \frac{\phi(w) - \phi(0)}{B_a}. \quad (4)$$

In the above equation we assume a  $2\pi$  periodic current phase relation along the junction.

For typical values of the London penetration depth ( $\lambda \approx 100$  nm) for our 90 nm thick Al films<sup>2</sup>, we obtain effective areas in the range  $0.68 - 0.70 \mu\text{m}^2$ , which is very close to the experimental value of  $0.75 \mu\text{m}^2$ . This strongly supports that a  $2\pi$  periodic current phase relation mainly dominates the magnetic pattern of the critical current in our junctions.

### **Supplementary Note 2. EFFECTS OF THERMAL CYCLING AND OCCURRENCE OF $0 - \pi$ TRANSITIONS IN THE MAGNETIC PATTERN**

We have measured a total of 14 devices, including Josephson junctions and dc SQUIDs (see Table 1 in the main text), all fabricated with flakes from the same  $\text{Bi}_2\text{Te}_3$  film. 12 devices have been measured in a second cool down; 5 of them showed unconventional magnetic patterns, with a minimum at zero field.

Supplementary Figure 2 shows another example of a high field inverted pattern for a dc SQUID (SF8). In this case there are two different modulations of the critical current: one is determined by the SQUID loop and the other is determined by the magnetic response of the single junctions forming the SQUID, which gives a dip at zero magnetic field in the convolution of the maxima of the SQUID modulation (Supplementary Figure 2A). Supplementary Figure 2B shows the magnetic pattern of the SQUID at low fields.

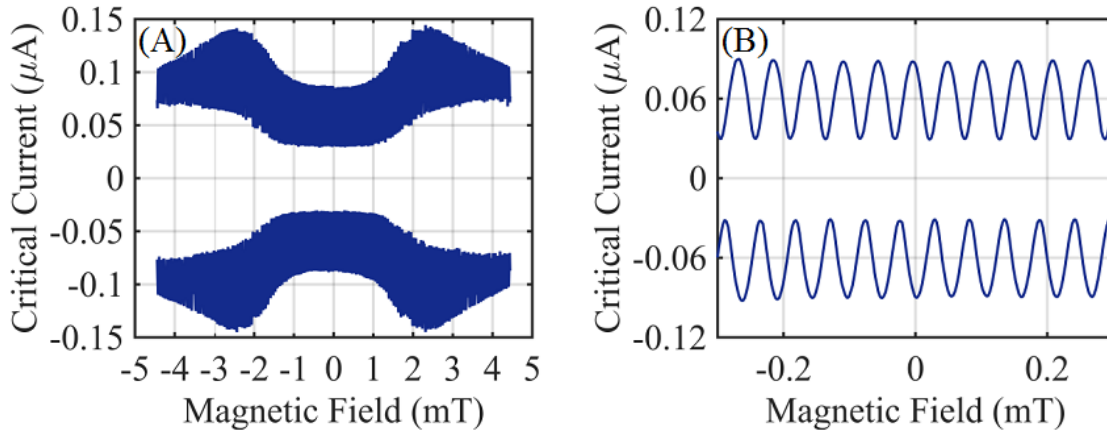

Supplementary Figure 2: **Critical current dependence as a function of the externally applied magnetic field of the SQUID FS8 at  $T = 20$  mK.** Panel (A) clearly shows the feature of the magnetic response of the single junctions forming the SQUID, while the modulation due to the SQUID loop cannot be resolved on this scale (see text for details). The SQUID modulation becomes visible at low external magnetic fields (panel (B)).

### Supplementary Note 3. MICROSCOPIC ORIGIN OF THE THERMAL CYCLING EFFECT

The thermal cycling effect has its origin in the role played by strain to tune the topological phase in TIs. In our devices, the complex interplay between the thermal properties of the substrate and the flake, the specifics of the interface between the Pt sticking layer and the Al, and the nanoscale dimensions of the devices have a fundamental role in creating plastic deformation at the TI nanogap separating the superconducting electrodes. The irreversible consequences of a compressive strain, induced by thermal cycling, manifest as peculiar buckling waves at the nanogap and a dramatic reduction of the Josephson current.

First principle calculations<sup>3,4</sup> have demonstrated that an in-plane tensile strain (pulling) leads to a out of plane compression where the quintuple layers are getting closer. An in plane compressive

strain (pushing) causes instead an out of plane expansion where the distance between quintuple layers is enhanced. The interquintuple interaction plays a dominant role in determining the topological phase: the consequence of an out of plane compression is a shift of the Dirac point closer to the valence band while an out of plane expansion leads to a gap opening at the Dirac point<sup>3</sup>. This argument is also used to explain why for example  $\text{Sb}_2\text{Se}_3$  (with a larger  $c/a$  ratio compared to  $\text{Bi}_2\text{Se}_3$ ) that is expected to be a TI in many ways, is instead a trivial insulator. It also tells that, in principle, strain can provide a tuning of the surface states of a topological insulator.

Strain is usually generated during the epitaxial growth of the material on the substrate, with lattice parameters different from those of the topological insulator. Recent reports have shown the tunability of the Dirac point with strain in thin topological crystalline insulator  $\text{SnTe}$ <sup>5</sup> and at grain boundaries in  $\text{Sb}_2\text{Se}_3$  thin films<sup>6</sup>.

Our experiment is quite different since our devices employ  $\text{Bi}_2\text{Te}_3$  flakes exfoliated and transferred to a  $\text{SiO}_2/\text{Si}$  substrate, so a possible strain-related phenomenology cannot be attributed to the growth process.

The physics behind the peculiar transport properties of our devices is instead related to the enormous difference in the thermal expansion coefficient  $\alpha$  of  $\text{Bi}_2\text{Te}_3$  ( $\approx 13.4 \times 10^{-6} \text{ }^\circ\text{C}^{-1}$ ) and that of the  $\text{SiO}_2/\text{Si}$  substrate ( $0.5 \times 10^{-6} \text{ }^\circ\text{C}^{-1}/2.4 \times 10^{-6} \text{ }^\circ\text{C}^{-1}$ ) where the flake is transferred. In our device configuration the  $\text{Bi}_2\text{Te}_3$  is not grown on a  $\text{SiO}_2/\text{Si}$  substrate: the flake therefore will experience the huge difference in the thermal expansion coefficient only by the clamping to the substrate, which occurs through the patterning of the Al electrodes forming a nanometer sized gap junction.

At the first cool down, from room temperature to mK, the flake is prone to contract. However the Al electrodes will anchor the flake to the substrate making it experiencing the much smaller thermal coefficient of the  $\text{SiO}_2/\text{Si}$ . This leads to a tensile strain (pulling of the flake) which strongly concentrated in the part of the flake located at the nanogap. This important fact is related to the thermal expansion coefficient of Al ( $\approx 23 \times 10^{-6} \text{ }^\circ\text{C}^{-1}$ ) not much different from that of the  $\text{Bi}_2\text{Te}_3$ . For a good bonding between the Al and the flake, as the one provided by the Pt sticking layer, one can consider the Al electrodes and the flake under them as forming a quite homogenous material with a thickness more than twice that of the flake (the thickness of Al is roughly twice that of the flake). In this way most of the strain, provided by the Al electrodes and locking the flake to the substrate, is located at the thin  $\text{Bi}_2\text{Te}_3$  nanogap, with a smaller thickness compared to that of the composite material Al/flake.

Since the tensile strain concentrates in the nanogap region, in this part of the flake the Dirac

node is shifted towards the valence band which makes the  $\text{Bi}_2\text{Te}_3$  channel effectively more doped.

During the warming up of the sample the  $\text{Bi}_2\text{Te}_3$  at the nanogap undergoes instead a compressive strain which opens a gap at the Dirac point. This compressive strain induces plastic deformation (the sample properties are completely changed after thermal cycling) and, if it overcomes a critical strain, can lead to a buckling of the  $\text{Bi}_2\text{Te}_3$  channel forming the nanogap.

Supplementary Figure 3a shows a SEM top picture of one of the sample discussed in our paper. This specific picture does not show, very clearly, possible anomalous features of the flake inside

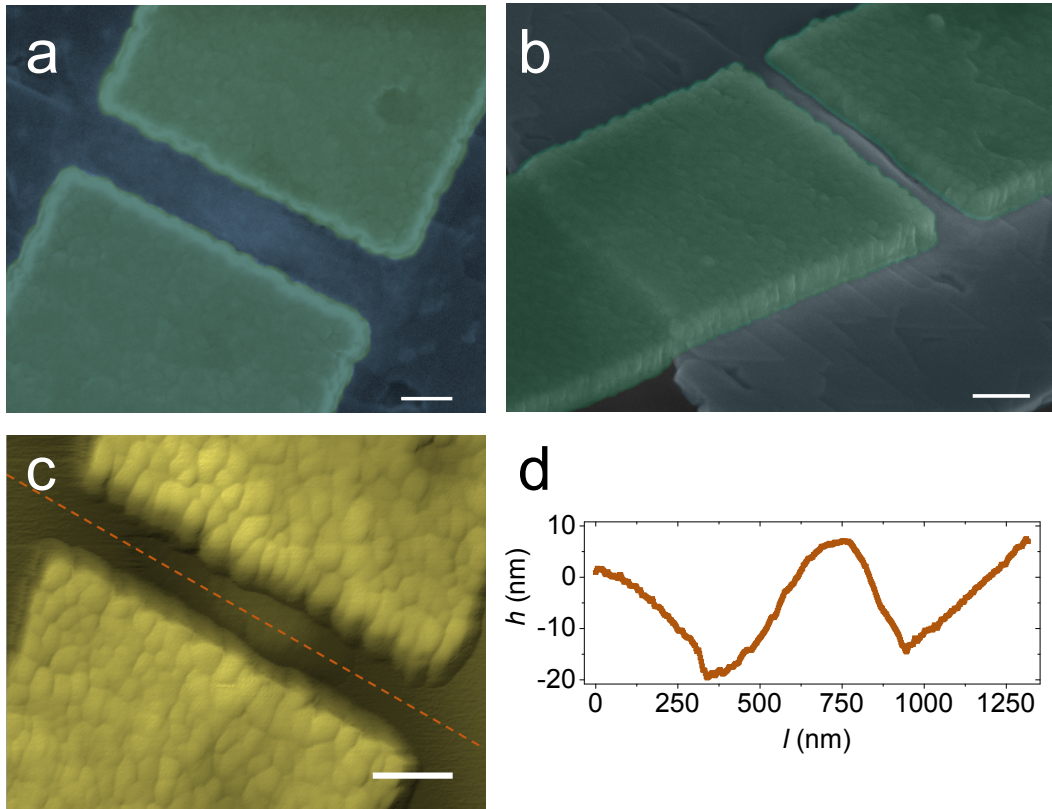

Supplementary Figure 3: **Colored SEM and AFM images for a junction showing a  $0-\pi$  magnetic pattern.** This device is one of those discussed in our main manuscript (Pt interlayer). (a) SEM top view (scale bar: 200 nm); (b) tilted view (scale bar: 200 nm), green color represents the electrodes; (c) AFM height image (scale bar: 150 nm); (d) height profile along the junction.

the nanogap, except a region with a slightly brighter color. However by taking a SEM picture at an angle, shown in Supplementary Figure 3b, the brightness at the nanogap clearly manifests as a buckling feature<sup>7</sup>. To further evaluate the characteristics of such a buckling, we have performed AFM analysis to resolve the shape of the deformation inside the nanogap. Supplementary Figure 3c shows an AFM picture of the same junction, while Supplementary Figure 3d a line scan (orange

dashed line) taken inside the nanogap. The line scan has a very clear sinusoidal-like shape, a distinctive feature of a bucking phenomenon induced by compressive strain.

**A. Role of the interlayer material: comparison between transport properties of Al/Pt/Bi<sub>2</sub>Te<sub>3</sub>/Pt/Al and Al/Ti/Bi<sub>2</sub>Te<sub>3</sub>/Ti/Al**

In our previous works<sup>8,9</sup>, we have studied the transport properties of Al/Pt/Bi<sub>2</sub>Se<sub>3</sub>/Pt/Al and Al/Ti/Bi<sub>2</sub>Se<sub>3</sub>/Ti/Al where the flakes were exfoliated from single crystals. The comparison showed much larger critical current densities and  $I_C R_N$  product for devices obtained with a Pt interlayer, both facts pointing towards a higher interface transparency barrier (I) (see Supplementary Figure 4), instrumental to observe Majorana bound state physics.

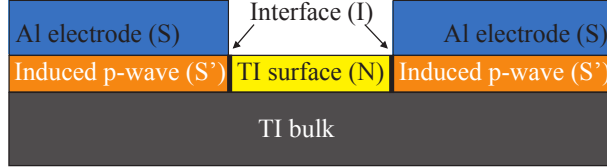

Supplementary Figure 4: **Cross section schematics of the effective device under consideration.** The transport properties can be assimilated to those of a S'INIS' Josephson junction where S' represent the induced chiral p-wave superconductor in the TI.

We have repeated this experiment on the Bi<sub>2</sub>Te<sub>3</sub> flakes of this work, with the peculiar triangular morphology, by using a Ti interlayer.

Supplementary Table 1 summarizes the main transport properties of the junctions fabricated using both Pt and Ti. We confirm the general trend: the  $J_C$  and  $I_C R_N$  values for the Pt interlayers are on average more than 5 times higher than those obtained with Ti. The same trend, higher values for Pt junctions, is observed for the average transparencies of the barrier I. This comparison is made at the first cool down.

|                                    | $J_C$ ( $\mu\text{A}/\mu\text{m}$ ) | $I_C R_N$ ( $\mu\text{eV}$ ) | $\tau$ (transparency) |
|------------------------------------|-------------------------------------|------------------------------|-----------------------|
| Rough flakes, <b>Pt</b> interlayer | $2.7 \pm 0.8$                       | $79 \pm 19$                  | $0.67 \pm 0.05$       |
| Rough flakes, <b>Ti</b> interlayer | $0.41 \pm 0.14$                     | $13 \pm 3$                   | $0.49 \pm 0.01$       |

Supplementary Table 1: **Main parameters extracted from the IVCs of the Bi<sub>2</sub>Te<sub>3</sub> junctions with different interlayer metals.**

Supplementary Figure 5 compares the conductance spectra, obtained by differentiating the current voltage characteristics (IVCs), of various junctions fabricated with Ti interlayer, with those obtained with a Pt interlayer. The curves of Supplementary Figure 5b (Ti interlayer) clearly show a dip at  $V \approx 230 \mu\text{eV}$  that we have identified as  $2\Delta_{S'}$ , where  $\Delta_{S'}$  is the induced gap into the TI<sup>10,11</sup>. In the spectra of Supplementary Figure 5b no other dips can be clearly identified. Supplementary Figure 5d shows instead various spectra relative to the IVCs of junctions fabricated with Pt interlayer. Also in this case we can identify a well developed dip at  $V \approx 230 \mu\text{eV}$  (much more pronounced than the Ti case due to the higher transparency  $\tau$  of the barrier I) that we correlate with  $2\Delta_{S'}$ , where again  $\Delta_{S'}$  is the induced gap (this correlation is unambiguous because of the peculiar temperature dependence of  $2\Delta_{S'}$ <sup>10,11</sup>).

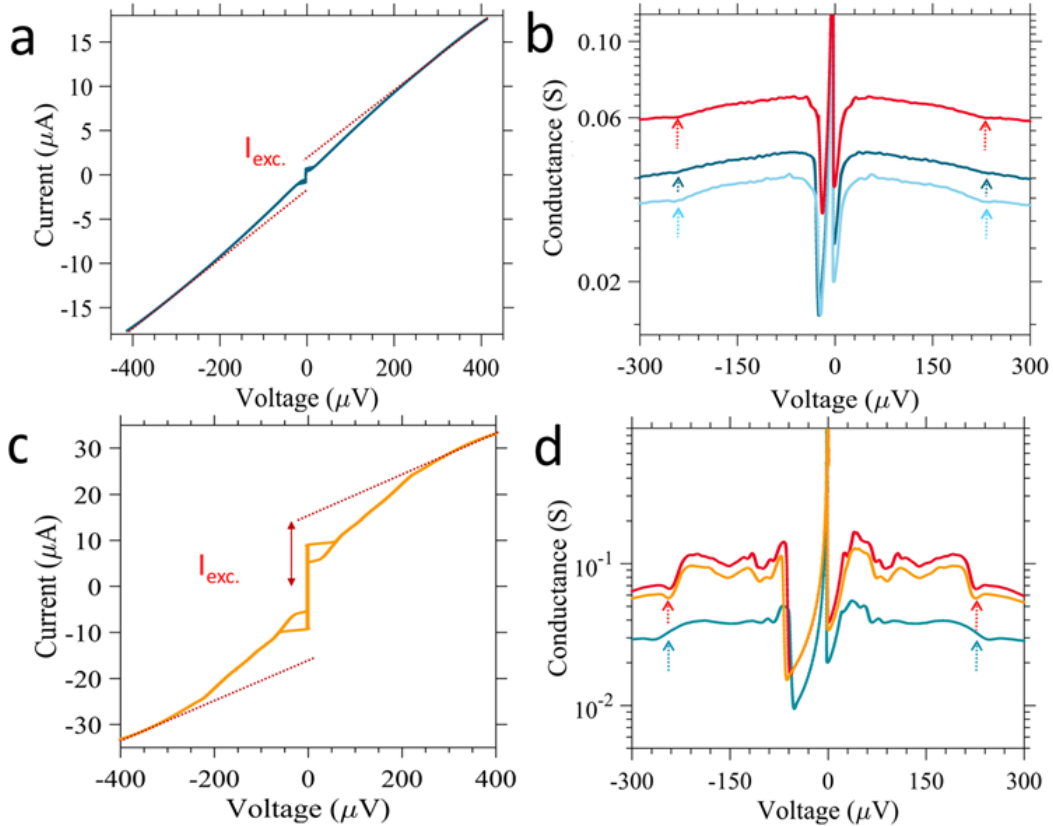

Supplementary Figure 5: **IVCs and conductance spectra for different interlayer metals.** IVCs of the  $\text{Bi}_2\text{Te}_3$  junctions with (a) - Ti and (c) - Pt interlayer metal; the dashed line in both graphs represents linear fit to extract the excess current. Conductance spectra for three junctions with (b) - Ti and (d) - Pt interlayer metals; the arrows indicate the deeps corresponding to  $2\Delta_{S'}$ .

However the conductance curves of the junctions with Pt have many more dips at different voltages, associated to multiple Andreev reflections and that are made visible because of the higher

transparencies interfaces I, as we find in our experiment<sup>11</sup>. To summarize these measurements we observe 1) the interface  $\text{Bi}_2\text{Te}_3/\text{Pt}/\text{Al}$  and  $\text{Bi}_2\text{Te}_3/\text{Ti}/\text{Al}$  have the same transparency since the induced gap  $\Delta_{S'} \approx 115 \mu\text{eV}$  is *exactly the same for both kind of junctions* and 2) the difference in the  $J_C$  values,  $I_C R_N$  and transparency  $\tau$  has to be related to the higher transparent interfaces I, between the part of the flake in the nano-channel and that under the electrodes, for the Pt junctions. The magnetic pattern of the Josephson current for both Pt and Ti junctions are Fraunhofer-like at the first cool down. However at the second cool down the junctions with Ti interlayer are not affected by the thermal cycle. The IVCs and the magnetic Fraunhofer pattern do not have any variation. We have cooled down the junctions from room to 20 mK temperature 3 times and the transport properties are completely preserved. This fact is in line with the results obtained by other groups working with 3DTI and using Ti as sticking layer.

*What makes the junctions with Pt interlayers so different from the Ti?*

We tend to exclude an origin related to a different chemistry between Pt and Ti while bonding to the  $\text{Bi}_2\text{Te}_3$ . This is because the values of the induced gap  $\Delta_{S'}$  are identical, which is a consequence of very similar interface transparency.

Instead we will show that the completely different behavior between Ti and Pt junctions is related to different growth habits of the two metals on  $\text{Bi}_2\text{Te}_3$ .

Supplementary Figure 6a shows an AFM picture of a 3 nm Pt grown on a  $\text{Bi}_2\text{Te}_3$  flake. The image shows a uniform layer that nicely wets the  $\text{Bi}_2\text{Te}_3$  flake smoothening edges and corners. The growth habits of a 3 nm Ti film are instead quite different (see Supplementary Figure 6b). The Ti does not wet forming tiny grains (on average 20 nm in diameter) on the surface of  $\text{Bi}_2\text{Te}_3$ . As a result the morphology of the Al film, which grows on top of the Ti is much more granular (data not shown), compared to the growth on Pt.

The Al electrodes have the role of clamping the flake to the substrate so as to experience a tensile and compressive strain. For this to happen the Al and the flake underneath need to behave like almost the same material. The wetting properties of the Pt on the  $\text{Bi}_2\text{Te}_3$  appear to promote an excellent Al adhesion and therefore an effective clamping of the flake to the substrate. The granular growth of the Ti interlayer on  $\text{Bi}_2\text{Te}_3$  instead does not seem to be as effective in this respect. While the interface properties of the Al and  $\text{Bi}_2\text{Te}_3$  through the Ti are very similar to the Pt junctions, the granularity of the Ti sticking layer makes the Al and the  $\text{Bi}_2\text{Te}_3$  flake not as strongly connected to each other to behave as a homogenous materials. In this way no plastic



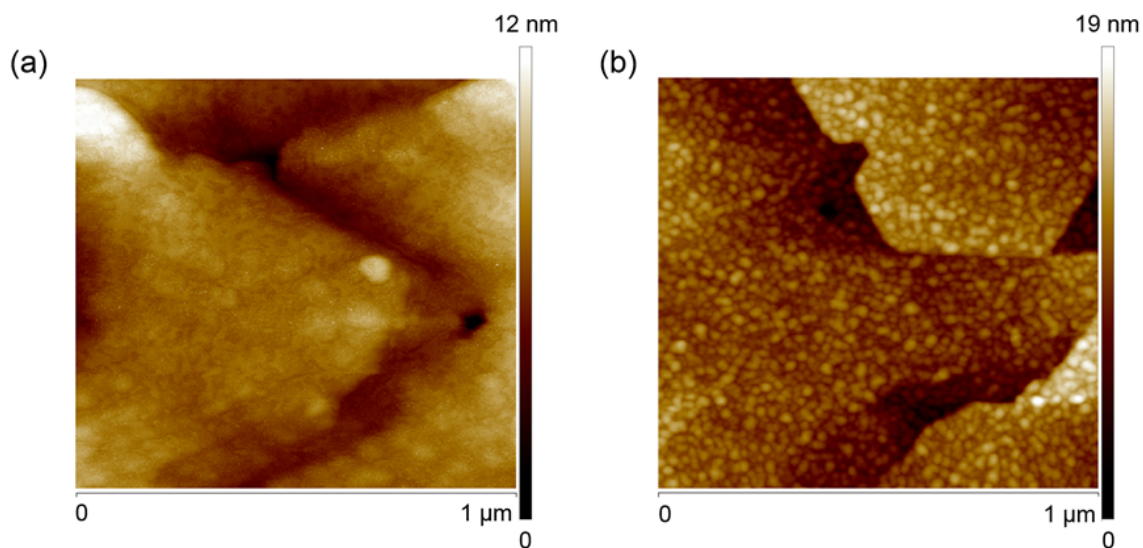

Supplementary Figure 6: **Growth habits of Pt and Ti on a Bi<sub>2</sub>Te<sub>3</sub> flake.** AFM images of a Bi<sub>2</sub>Te<sub>3</sub> flake covered (a) with 3 nm Pt and (b) with 3 nm Ti.

deformations are induced. Supplementary Figure 7b shows a typical top view SEM picture for one of the measured junction after several cool down; Supplementary Figure 7a is a SEM image of the same device taken with a tilted angle. None of the images show signature of buckling wave that instead we have detected in junctions with Pt interlayer.

It is worth mentioning what could be the origin of the much higher critical current densities we observe in junctions with Pt interlayer compared with those with Ti at the first cool down.

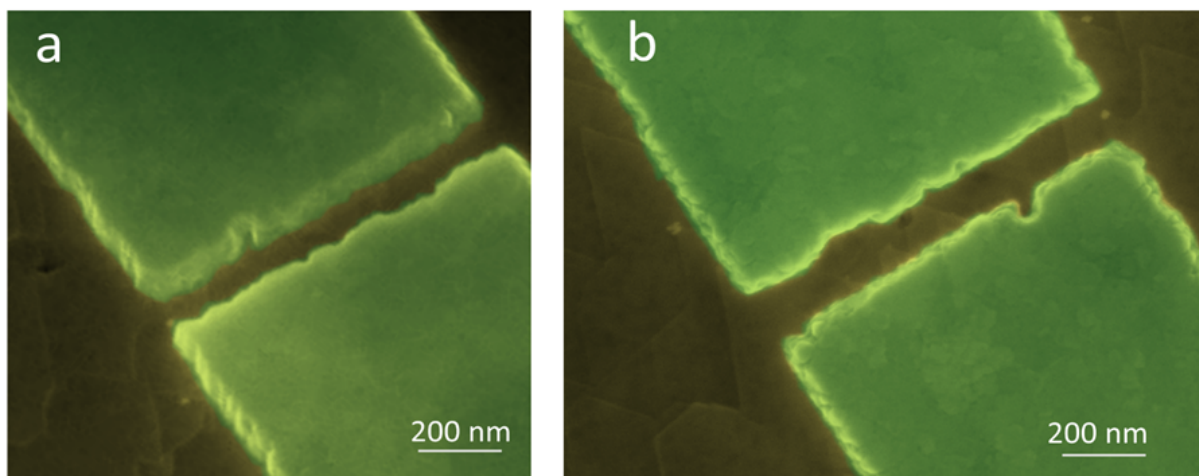

Supplementary Figure 7: **Colored SEM images for a junction with Al electrodes and Ti interlayer.** (a) Tilted view; (b) side view. The electrodes are represented in light green color.

We believe it is a consequence of the occurrence of a tensile strain experienced by the flake in the nanogap.

The origin of the barrier I between the flake under the Al/Pt(Ti) electrodes and the one in the nanogap is not clearly established. One can possibly expect some doping from the metal, which shifts the Fermi energy of the flake under the electrode, compared to the one in the nanogap. The occurrence of a tensile strain at the nanogap while cooling the nanodevice, shift the Dirac point toward the valence bands making it more doped. Since the effect of strain is much more dominant in junctions with Pt, one can expect a better Fermi level matching between the two parts of the flake, under the electrodes and at the nanogap, resulting in a higher transparency barrier and higher  $J_C$  values.

#### **Supplementary Note 4. TWO DIMENSIONAL MAGNETO-FINGERPRINTS IN $\text{Bi}_2\text{Te}_3$ CHANNELS**

In the paper by Kandala et al.<sup>12</sup>, the authors study the magneto transport of  $\text{Bi}_2\text{Se}_3$  channels, where the films have a typical growth with pyramidal domains. The authors reveal signatures of Aharonov-Bohm (AB) orbits, manifesting as periodic magneto conductance fluctuations. The length scale of the orbits corresponds to the typical perimeter of triangular terraces found on the surface of these thin film devices. They conclude that the periodic magneto-fingerprint arises from coherent scattering of electron waves from the step-edges. To demonstrate that this scenario is also valid for the  $\text{Bi}_2\text{Te}_3$  flakes, used in our work, we have preformed magneto transport measurements down to 20 mK temperature on devices with a Hall configuration.

Supplementary Figure 8a shows the longitudinal resistance between the two voltage probes with a distance of  $0.5 \mu\text{m}$  (the classical quadratic magneto-resistance background has been subtracted for clarity) in the range of magnetic field 1-3 T for various temperatures. From the Fourier transform of the curves, Supplementary Figure 8b, we clearly observe a peak around  $2.9 \text{ T}^{-1}$  which corresponds to an area of  $0.012 \mu\text{m}^2$  in line with the morphology of our flakes and in complete agreement with the values reported in Ref. 12 for a device of similar dimensions as ours. Moreover we clearly see that the amplitude of the magnetoresistance oscillations decreases with temperature (inset of Supplementary Figure 8b) in a similar fashion as in Ref. 12. This strongly suggests that also in our case the periodic magneto-resistance oscillations arise from coherent scattering of electron wave from the corners and/or step-edges where two pyramidal domains merge.

It is also worth discussing if one can find any apparent correlation, between the orientation of the

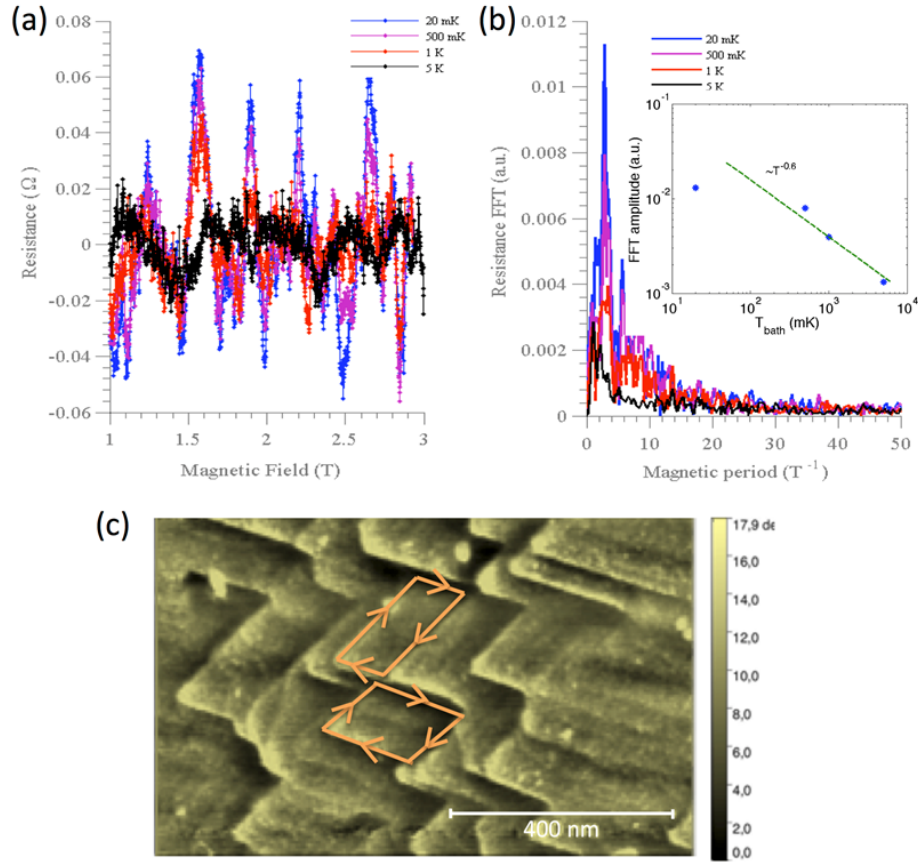

Supplementary Figure 8: **Two dimensional magneto-fingerprints in  $\text{Bi}_2\text{Se}_3$  channels.**

(a) Longitudinal resistance as a function of magnetic field for a channel length of  $0.5 \mu\text{m}$  at different temperatures. (b) Fourier transform of the curves of panel (a). The inset shows the Fourier transform amplitude at  $2.9 \text{ T}^{-1}$  as a function of temperature. The data have a typical power law dependence (with exponent  $-0.6$ ). (c) Typical surface morphology of the flakes used in the experiment. The orange lines delimitate two possible Arhonor-Bhom orbits with approximately the same area.

nano-pyramidal domains and that of the electrodes, with the occurrence of unconventional magnetic field pattern related to  $0$  and  $\pi$  trajectories inside the  $\text{Bi}_2\text{Te}_3$  nanochannel. We have investigated by SEM all the junctions having a  $0$ - $\pi$  transition and we do not find any clear correlation between the orientation of the nano-pyramidal domains and that of the electrodes. However this is not surprising if one considers that the basic mechanism to get an inverted magnetic field pattern, with a minimum of the critical current at zero external field, is the occurrence of  $0$  and  $\pi$  facets within the same nanogap. In our flakes the occurrence of AB oscillations supports preferential trajectories of electrons and holes along the edges of the triangles. Supplementary Figure 9 shows

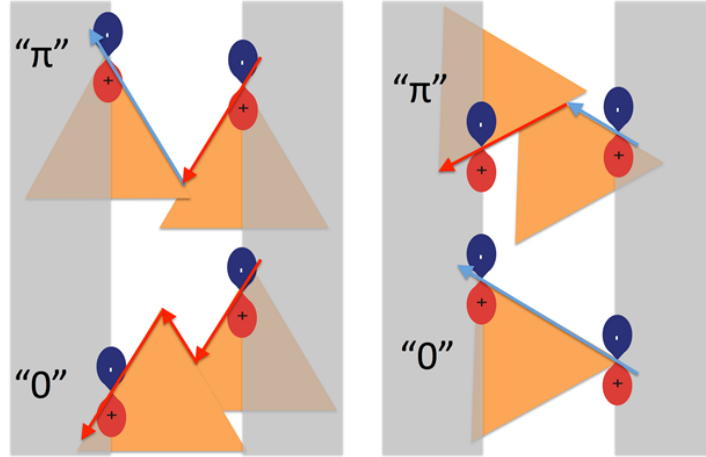

Supplementary Figure 9: **Schematic pictures of a Josephson junction with different orientation of the pyramidal domains in the nanogap with respect to the Al electrodes.** In the left panel, the main direction of the pyramidal domains is aligned parallel to the Al electrodes, while it is perpendicular to them in the right panel. In the figure, 0 and  $\pi$  trajectories can be found in both cases.

a sketch corresponding to two extremes cases where the main alignment direction of the pyramidal domains is parallel (Supplementary Figure 9a) or perpendicular (Supplementary Figure 9b) to the electrodes. We see that in both cases one can find 0 and  $\pi$  trajectories, which would lead to an inverted Fraunhofer pattern.

**Supplementary Note 5. PERIODICITY OF A MAGNETIC PATTERN WITH REGULAR AND RANDOM DISTRIBUTED 0- $\pi$  FACETS.**

The magnetic patter of a regular 0- $\pi$  faceted Josephson junction is strongly modified compared to a Fraunhofer-like. Supplementary Figure 10 shows the  $I_C(B)$  for a junction formed by a total of 10 equal in size 0 and  $\pi$  facets carrying the same current<sup>17</sup>. The absolute maximum of the pattern is found at  $5\phi_0$ . This is quite easy to understand since one requires a  $\phi_0$  to reverse the phase sign of every  $\pi$  facet. However one can still find the periodicity connected to the total junction's width in the position of the minima which happen at multiple of  $\phi_0$  (see Supplementary Figure 10). For a random distribution of facets the absolute maximum will always occur at finite field (which will depend on the microscopic distribution of 0- $\pi$  facets), while at zero external field one can find a local maximum (not the absolute maximum) or a local minimum again dependent on the details of the facets microscopic distribution.

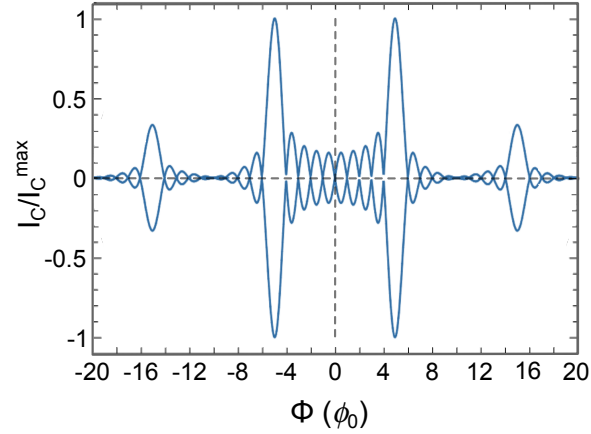

Supplementary Figure 10: **Simulated magnetic flux dependence of the Josephson current for an array of 10 alternating 0 and  $\pi$  facets.**

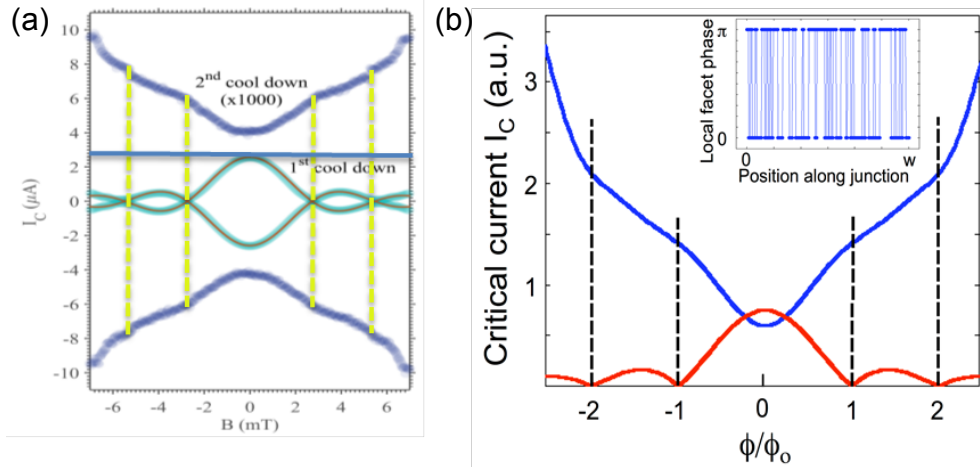

Supplementary Figure 11: **Magnetic field dependence of a typical  $\text{Bi}_2\text{Te}_3$  junction compared with that of a simulated array of random distributed 0 and  $\pi$  facets.**

(a) Critical current  $I_C$  dependence on the externally applied magnetic field  $B$  for one of our junctions at 20 mK, before (cyan) and after (blue) the thermal cycle. At the first cool down the  $I_C(B)$  dependence shows a conventional Fraunhofer dependence. After the thermal cycle (blue points), the critical current is dramatically reduced (the data points are multiplied by a factor 1000 for clarity), and a dip at  $B=0$  appears. (b) Numerically calculated  $I_C(B)$  (blue curve) for a random distribution of 0 and  $\pi$  facets (see inset) compared with a conventional Fraunhofer type dependence calculated considering a uniform current distribution.

The periodicity connected to the size of the junction can be still identified as local minima, local maxima or change in slope in the  $I_C(B)$ . As an example in Supplementary Figure 11(b) we show the computed magnetic field dependence  $I_C(B)$  for a uniform current distribution (red curve) compared with a random distribution of 0 and  $\pi$  facets (blue curve).

For the random case we can clearly identify change of slopes at  $\phi_0$  and  $2\phi_0$  (indicated by the dashed lines) which corresponds to the periodicity determined by the width of the junction. Indeed such a scenario qualitatively reproduces what we observe in our experiment (see Supplementary Figure 11(a)) and that is discussed in the manuscript.

### Supplementary Note 6. FIT OF THE $I_C(T)$ DEPENDENCE WITH A SINIS MODEL

The full theory of the Josephson effect in SINIS structures with chiral p-wave ( $p_x + ip_y$ ) superconducting leads is still lacking. In Ref. 13, Sawa et al have considered a SINIS system with  $p_x + ip_y$  superconducting leads and diffusive normal part, numerically solved Usadel equations and determined the  $I_C(T)$  dependence. This dependence turns out to be qualitatively very similar to that of an usual SINIS junction with s-wave leads. Moreover, in the limit of highly transparent insulating barriers  $I_C(T)$  dependence for s-wave and p-wave leads are found to be essentially identical. In Ref. 14 the authors have considered a SINIS structure with chiral p-wave leads and short ballistic normal metal. These authors have also found that for perfectly transmitting barriers both  $p_x + ip_y$  and s-wave pairing symmetries lead to the same  $I_C(T)$  dependence. In view of these previous works, we have modeled our highly transparent junctions measured during the first cool down as S'INIS' structures (where S' is the proximity induced superconductor) with conventional s-wave superconducting leads, for which a simple analytical formula for the Josephson current exists in the clean ballistic limit<sup>15</sup>. The same approach has been adopted in an earlier work<sup>16</sup>.

For our S'INIS' junctions, we consider the limit of wide junction,  $k_F w \gg 1$ , and use the following expression for the critical current

$$I_J(\phi) = \frac{4ek_B T}{\hbar} \frac{k_F w}{\pi} \sin \phi \sum_{\omega_n > 0} \int_0^1 d\mu \frac{t_1 t_2}{\sqrt{Q(\phi, \sqrt{1 - \mu^2})}}. \quad (5)$$

Here  $\mu = \sin \theta$ , where  $\theta$  is the angle between the velocity of an electron flying out of a lead and the shortest line connecting the two leads,

$$t_1 = \frac{D_1}{2 - D_1}, \quad t_2 = \frac{D_2}{2 - D_2} \quad (6)$$

are the effective Andreev transparencies of the barriers<sup>16</sup>,  $D_1$  and  $D_2$  are the usual barrier transparencies in the normal state. In Eq. (5), the function  $Q$  is defined as

$$Q(\phi, \sqrt{1-\mu^2}) = \left[ t_1 t_2 \cos \phi + \left( 1 + (1 + t_1 t_2) \frac{\hbar^2 \omega_n^2}{\Delta^2} \right) \cosh [2\omega_n t_0(\mu)] + (t_1 + t_2) \frac{\hbar^2 \Omega_n \omega_n}{\Delta^2} \sinh [2\omega_n t_0(\mu)] \right]^2 - (1 - t_1^2)(1 - t_2^2) \frac{\hbar^4 \Omega_n^4}{\Delta^4}, \quad (7)$$

$$\omega_n = \frac{\pi k_B T (2n + 1)}{\hbar}, \quad (8)$$

$$\hbar \Omega_n = \sqrt{\hbar^2 \omega_n^2 + \Delta^2}, \quad (9)$$

$\omega_n$  are the Matsubara frequencies, and  $t_0(\mu)$  is the angular dependent average flight time of an electron between the leads for a given Fermi speed  $v_F$ , mean free path  $l_e$ , the separation between the leads  $L$ , and

$$t_0(\mu) = \frac{l_e}{(1 - \mu^2) v_F \left( \sqrt{1 + \frac{l_e^2}{L^2(1 - \mu^2)}} - 1 \right)}. \quad (10)$$

Supplementary Equation (10) may be viewed as an interpolation between the clean limit ( $l_e \gg L$ ), in which case

$$t_0(\mu) = \frac{L}{v_F \sqrt{1 - \mu^2}}, \quad (11)$$

and the diffusive limit ( $l_e \ll L$ ), where  $t_0$  does not any more depend on the angle and reads

$$t_0 = \frac{2L^2}{v_F l_e}. \quad (12)$$

For the normal state resistance in this model we find

$$\frac{1}{R} = \frac{e^2}{\pi \hbar} \frac{k_F w}{\pi} \frac{1}{\frac{1}{D_1} + \frac{1}{D_2} - 1 + \frac{2L}{\pi l_e}}. \quad (13)$$

The model outlined above differs from the original one<sup>15</sup> in two ways. Since we are dealing with a two dimensional normal layer (while in Ref. 15 a three dimensional normal metal was considered), we have replaced the integral over the two transverse components of the wave vector,  $k_y$  and  $k_z$ , by the corresponding one-dimensional integral over  $k_y$ , i.e. we have replaced  $dk_y dk_z / (2\pi)^2$  by  $dk_y / 2\pi h$ , where  $h$  is the flake thickness. Second, we have introduced finite mean free path into the expression for the Josephson current in a phenomenological way.

Namely, we have replaced the ballistic expression for the flight time, Supplementary Equation (11), by a more complicated one containing the mean free path, Supplementary Equation (10). We

have verified that this replacement correctly reproduces the known expression for the Josephson current of a short diffusive SINIS junction.

We have performed a fit on a selection of the junction listed in Table 1 (see main text), which covered a wide range in the magnitude of the critical current values (see Supplementary Figure 12). We used a value for the S' superconducting gap of  $\Delta_{S'} \approx 125 \mu\text{eV}$ , which is close to the value of the Al superconducting gap. The Fermi velocity of the electrons has been chosen to be  $v_F = 3.5 \cdot 10^5$

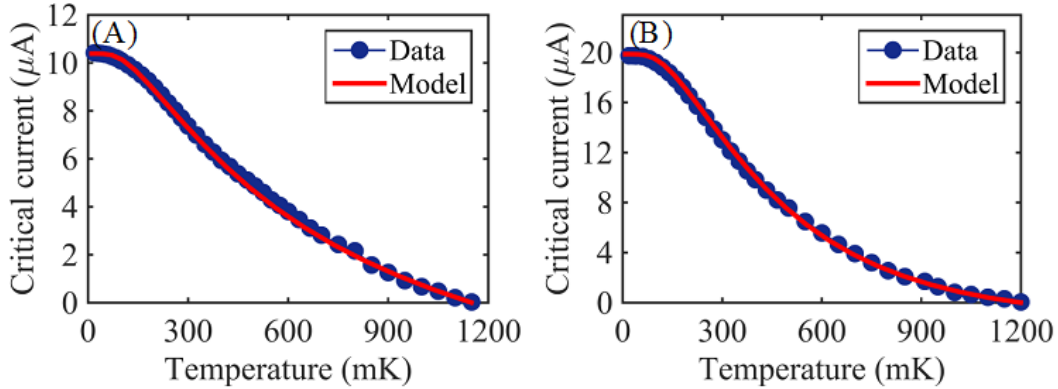

Supplementary Figure 12: **Critical current as a function of the temperature at the first cool down.** The measured  $I_C(T)$  dependencies are for samples MS1 (panel **A**) and FS4 (panel **B**). The red line is the best fit, considering a quasi-ballistic model (Supplementary Equations (5) and (7)). The fit parameters are listed in Supplementary Table 2.

$\text{m s}^{-1}$ , in agreement with literature, and the fitting parameters are: the Fermi energy,  $E_F$ , the mean free path,  $l_e$ , and the transparencies of the barriers, which we assumed to be identical,  $D_1 = D_2 = D$ . The theoretical value of the normal state resistance,  $R_{\text{th}}$ , has been determined from Supplementary Equation (13) and the Thouless energy was estimated as  $E_{\text{Th}} = \hbar v_F l_e / L^2$ .

The extracted values of the mean free path ( $l_e$ ) are typically comparable to the junction length, thus confirming a picture of an intermediate, between ballistic and diffusive, transport regime. The scattering centers are probably the edges of the pyramidal domains of the film, as we have discussed in the main text.

It is known<sup>16</sup> that the bulk of the flake should behave as a resistive shunt. From the expression

$$\frac{1}{R_{\text{sh}}} = \frac{1}{R_{\text{exp}}} - \frac{1}{R_{\text{th}}} \quad (14)$$

we have extracted the effective shunt resistances of the devices. In Supplementary Equation (14)  $R_{\text{th}}$  is the prediction of Supplementary Equation (13) and  $R_{\text{exp}}$  is the resistance measured in the experiment. The sheet resistances of the films associated with the bulk transport,  $R_{\square} = R_{\text{sh}} w / L$ ,



vary in the range between 150 and 550  $\Omega/\square$ . The corresponding resistivities, defined as  $\rho = R_{\square}h$ , are shown in Supplementary Table 2 and change between 1000 and 5000  $\mu\Omega\text{cm}$ , which is about one order of magnitude larger than the bulk resistivity reported in Ref. 16, which probably indicates a lower level of doping in our material. We believe that the scattering of the extracted values of the bulk resistivity between different devices is mostly caused by the uncertainty in the geometry of the samples, but it may also be explained by slightly different levels of doping.

| <b>Device</b> | $l_e$<br>(nm) | $D$ | $E_F$<br>(meV) | $E_{\text{Th}}$<br>( $\mu\text{eV}$ ) | $R_N^{\text{th}}$<br>( $\Omega$ ) | $R_{\text{sh}}$<br>( $\Omega$ ) | $R_{\square}$<br>( $\Omega$ ) | $\rho$<br>( $\mu\Omega\text{cm}$ ) |
|---------------|---------------|-----|----------------|---------------------------------------|-----------------------------------|---------------------------------|-------------------------------|------------------------------------|
| <b>JM1</b>    | 140           | .99 | 106            | 363                                   | 566                               | 101                             | 152                           | 1200                               |
| <b>JM10</b>   | 130           | .98 | 140            | 341                                   | 134                               | 47                              | 236                           | 1900                               |
| <b>SM4</b>    | 100           | .98 | 172            | 954                                   | 45                                | 27                              | 543                           | 4300                               |
| <b>SM1</b>    | 95            | .98 | 213            | 920                                   | 37                                | 25                              | 502                           | 4000                               |
| <b>SF4</b>    | 35            | .94 | 210            | 392                                   | 22                                | 3.5                             | 209                           | 1670                               |

Supplementary Table 2: **Parameters extracted from the fit of the  $I_C(T)$ .** The mean free path  $l_e$ , the transparency of the barriers  $D$  (assuming the two barriers are identical) and the Fermi energy  $E_F$  are the free parameters of the fit. From these parameters we derived the Thouless energy  $E_{\text{Th}}$ , the expected resistance above the gap  $R_N^{\text{th}}$ , the calculated shunt resistance of the flake  $R_{\text{sh}}$ , and the corresponding sheet resistance  $R_{\square}$  and resistivity  $\rho$ . The induced gap at zero temperature was taken to be  $\Delta(0) = 125 \mu\text{eV}$  and at higher temperatures the standard BCS gap temperature dependence has been used.

---

**SUPPLEMENTARY REFERENCES**

- <sup>1</sup> Rosenthal, P. A., Beasley, M. R., Char, K., Colclough, M. S. & Zaharchuk, G. Flux focusing effects in planar thin-film grain-boundary Josephson junctions. *Appl. Phys. Lett.* **59**, 3482 (1991).
- <sup>2</sup> Romijn, J., Klapwijk, T. M., Renne, M. J. & Mooij, J. E. Critical pair-breaking current in superconducting aluminum strips far below  $T_c$ . *Phys. Rev. B* **26**, 3648-3655 (1982).
- <sup>3</sup> Liu, W. et al. Anisotropic interactions and strain-induced topological phase transition in  $\text{Sb}_2\text{Se}_3$  and  $\text{Bi}_2\text{Se}_3$ . *Phys. Rev. B* **84**, 245105 (2011).
- <sup>4</sup> Young, S. M. et al. Theoretical investigation of the evolution of the topological phase of  $\text{Bi}_2\text{Se}_3$  under mechanical strain. *Phys. Rev. B* **84**, 085106 (2011).
- <sup>5</sup> Zeljkovic, I. et al. Strain engineering Dirac surface states in heteroepitaxial topological crystalline insulator thin films. *Nat. Nanotechnol.* **10**, 849-853 (2015).
- <sup>6</sup> Liu, Y. et al. Tuning Dirac states by strain in the topological insulator  $\text{Bi}_2\text{Se}_3$ . *Nature Phys.* **10**, 294-299 (2014).
- <sup>7</sup> Bowden, N., Brittain, S., Evans, A. G., Hutchinson, J. W., & Whitesides, G. M. Spontaneous formation of ordered structures in thin films of metals supported on an elastomeric polymer. *Nature* **393**, 146-149 (1998).
- <sup>8</sup> Galletti, L. et al. Influence of topological edge states on the properties of  $\text{Al}/\text{Bi}_2\text{Se}_3/\text{Al}$  hybrid Josephson devices. *Phys. Rev. B* **89**, 134512 (2014).
- <sup>9</sup> Galletti, L. et al. Josephson effect in  $\text{Al}/\text{Bi}_2\text{Se}_3/\text{Al}$  coplanar hybrid devices. *Physica C* **503**, 162 (2014).
- <sup>10</sup> Kjaergaard, M. et al. Transparent Semiconductor-Superconductor Interface and Induced Gap in an Epitaxial Heterostructure Josephson Junction. *arXiv:1607.04164v2* (2016)
- <sup>11</sup> Galletti, L. et al. High-Transparency  $\text{Al}/\text{Bi}_2\text{Te}_3$  Double-Barrier Heterostructures. *IEEE Trans. Appl. Supercond.* **27**, 1-4 (2017).
- <sup>12</sup> Kandala, A., Richardella, A., Zhang, D., Flanagan, T. C., & Samarth, N. Surface-sensitive two-dimensional magneto-fingerprint in mesoscopic  $\text{Bi}_2\text{Se}_3$  channels. *Nano Lett.* **13**, 2471-2476 (2013).
- <sup>13</sup> Sawa, Y., Yokoyama, T., Tanaka, Y. & Golubov, A. A. Quasiclassical Green's function theory of the Josephson effect in chiral p-wave superconductor/diffusive normal metal/chiral p-wave superconductor junctions. *Phys. Rev. B* **75**, 134508 (2007).
- <sup>14</sup> Tkachov, G. & Hankiewicz, E. M. Helical Andreev bound states and superconducting Klein tunneling in topological insulator Josephson junctions. *Phys. Rev. B* **88**, 075401 (2013).
- <sup>15</sup> Galaktionov, A. V. & Zaikin, A. D. Quantum interference and supercurrent in multiple-barrier proximity structures. *Phys. Rev. B* **65**, 184507 (2002).
- <sup>16</sup> Veldhorst, M. et al. Josephson supercurrent through a topological insulator surface state. *Nat. Mater.* **11**, 417-421 (2012).

- <sup>17</sup> Smilde, H. J. H. et al. d-Wave-Induced Josephson Current Counterflow in YBa<sub>2</sub>Cu<sub>3</sub>O<sub>7</sub>/Nb Zigzag Junctions. *Phys. Rev. Lett.* **88**, 057004 (2002).
